# Supplementary material
Source: PubMed Central journal article supplement (PMC9743775)
Supplement: 40168_2022_1409_MOESM1_ESM.pdf [file 40168_2022_1409_MOESM1_ESM.pdf]

## ***Supplementary Data:***

**Title: Significant alterations of intestinal symbiotic microbiota induced by intraperitoneal vaccination mediate changes in intestinal metabolism of NEW Genetically Improved Farmed Tilapia (NEW GIFT, *Oreochromis niloticus*)**

**Supplementary Table 1.** Results of tilapia body weight (kg) in different groups

| <b>Initial group</b> | <b>Control group</b> | <b>Vaccinated group</b> |
|----------------------|----------------------|-------------------------|
| 0.26                 | 0.28                 | 0.28                    |
| 0.26                 | 0.38                 | 0.27                    |
| 0.25                 | 0.34                 | 0.38                    |
| 0.21                 | 0.3                  | 0.32                    |
| 0.25                 | 0.32                 | 0.37                    |
| 0.2                  | 0.28                 | 0.34                    |
| 0.26                 | 0.29                 | 0.39                    |
| 0.25                 | 0.3                  | 0.35                    |
| 0.22                 | 0.31                 | 0.31                    |
| 0.23                 | 0.35                 | 0.33                    |
| 0.26                 | 0.37                 | 0.36                    |
| 0.24                 | 0.36                 | 0.29                    |
| $0.24 \pm 0.02$      | $0.32 \pm 0.04$ kg   | $0.33 \pm 0.04$ kg      |

**Supplementary Table 2.** The distribution range of valid sequences obtained by high-throughput sequencing in different sample types

| Sample types            | Number of valid reads per sample |
|-------------------------|----------------------------------|
| Stomach contents (S)    | 3400-8286                        |
| Stomach mucosae (W)     | 2671-5471                        |
| Gill mucosae (G)        | 6393-10160                       |
| Intestinal contents (C) | 5810-23908                       |
| Intestinal mucosae (M)  | 11980-70742                      |

**Supplementary Table 3.** Summary of alpha diversity indices calculated based on a cutoff of 97% similarity of 16S rRNA sequences

| Group | Indices        |                |             |             |               |
|-------|----------------|----------------|-------------|-------------|---------------|
|       | OTUs           | Chao           | Shannon     | Simpson     | Coverage      |
| PS    | 252 ± 3.56     | 285.04 ± 11.30 | 4.54 ± 0.18 | 0.03 ± 0.01 | 98.17 ± 0.40% |
| VS    | 240 ± 9.87     | 270.74 ± 9.76  | 4.43 ± 0.25 | 0.03 ± 0.02 | 98.23 ± 0.28% |
| PW    | 180.75 ± 41.36 | 223.60 ± 48.92 | 3.62 ± 0.56 | 0.08 ± 0.05 | 98.14 ± 0.34% |
| VW    | 196.75 ± 52.21 | 236.08 ± 67.33 | 3.84 ± 0.56 | 0.06 ± 0.04 | 98.11 ± 0.56% |
| PG    | 53.75 ± 11.76  | 64.19 ± 14.68  | 2.07 ± 0.14 | 0.21 ± 0.03 | 99.81 ± 0.06% |
| VG    | 60 ± 3.56      | 68.14 ± 6.35   | 2.08 ± 0.06 | 0.22 ± 0.02 | 99.79 ± 0.04% |
| PC    | 32 ± 12.03     | 42.19 ± 16.61  | 1.14 ± 0.36 | 0.49 ± 0.16 | 99.87 ± 0.07% |
| VC    | 55.75 ± 23.29  | 69.34 ± 22.30  | 2.04 ± 0.92 | 0.28 ± 0.25 | 99.78 ± 0.05% |
| PM    | 54.5 ± 8.02    | 80.53 ± 30.31  | 1.45 ± 0.50 | 0.38 ± 0.14 | 99.78 ± 0.03% |
| VM    | 50 ± 5.35      | 55.28 ± 6.23   | 2.01 ± 0.25 | 0.24 ± 0.05 | 99.82 ± 0.04% |

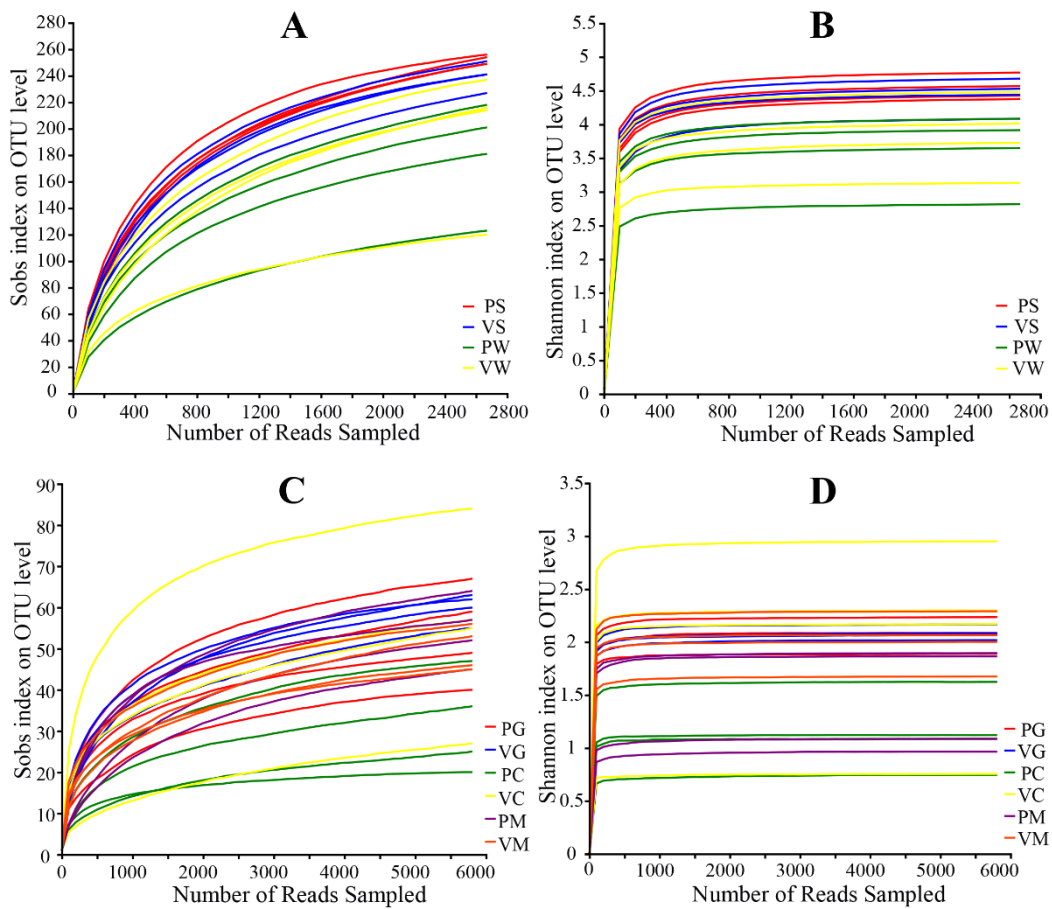

**Supplementary Figure 1.** Rarefaction analyses of OTUs clustered at 97% sequence identity of all samples: **(A)** Rarefaction curves on OTU level of the stomach contents and mucosae; **(B)** Shannon curves on OTU level of the stomach contents and mucosae; **(C)** Rarefaction curves on OTU level of the gill and intestinal samples; **(D)** Shannon curves on OTU level of the gill and intestinal samples. PS: stomach contents in the control group; VS: stomach contents in the vaccinated group; PW: stomach mucosae in the control group; VW: stomach mucosae in the vaccinated group; PG: gill mucosae in the control group; VG: gill mucosae in the vaccinated group; PC: intestinal contents in the control group; VC: intestinal contents in the vaccinated group; PM: intestinal mucosae in the control group; VM: intestinal mucosae in the vaccinated group.

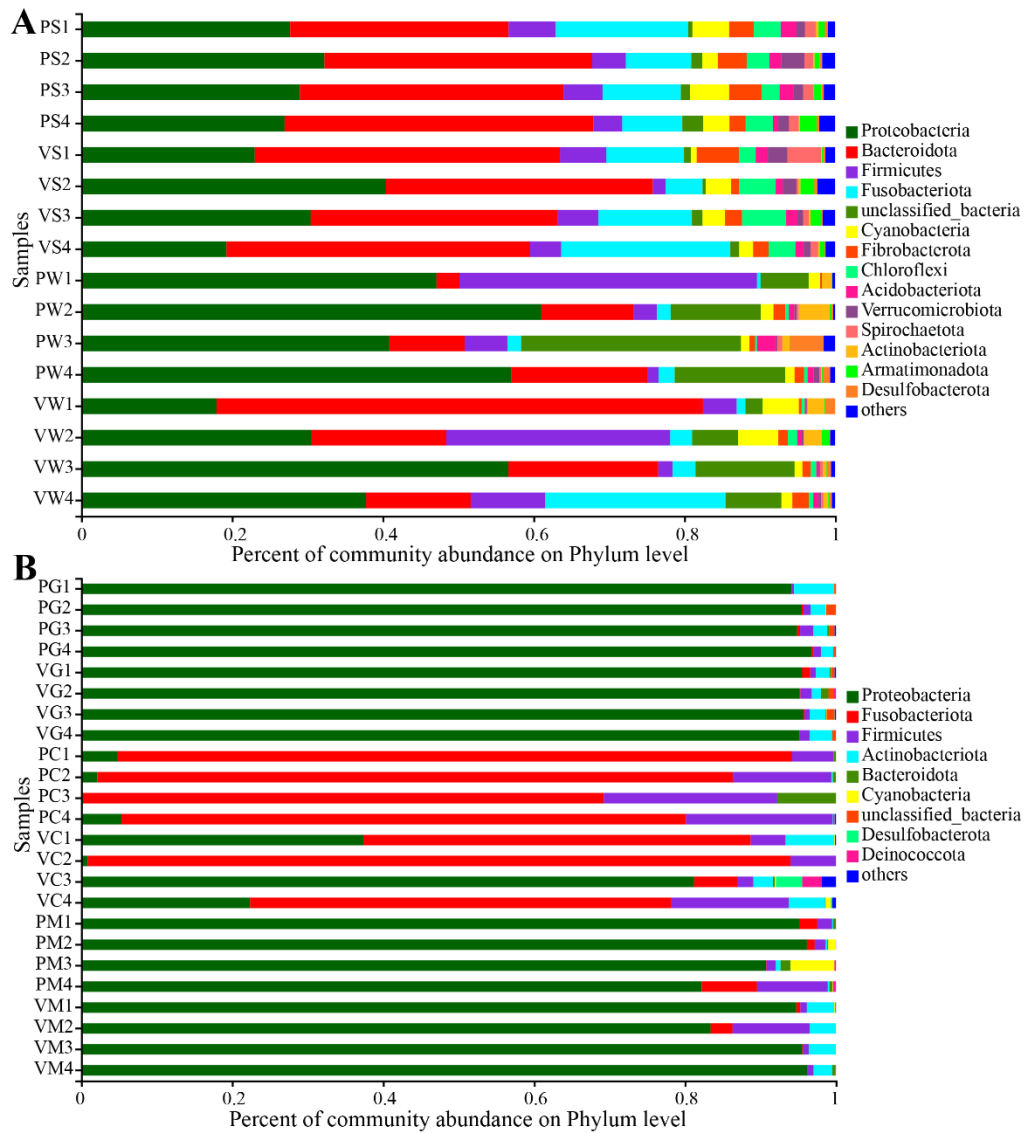

**Supplementary Figure 2.** Distribution of the bacterial communities in all samples at the phylum level:

(A) Bacterial phyla in the stomach content and mucosa samples; (B) Bacterial phyla in the gill and intestinal samples. PS1-PS4: stomach contents in the control group; VS1-VS4: stomach contents in the vaccinated group; PW1-PW4: stomach mucosae in the control group; VW1-VW4: stomach mucosae in the vaccinated group; PG1-PG4: gill mucosae in the control group; VG1-VG4: gill mucosae in the vaccinated group; PC1-PC4: intestinal contents in the control group; VC1-VC4: intestinal contents in the vaccinated group; PM1-PM4: intestinal mucosae in the control group; VM1-VM4: intestinal mucosae in the vaccinated group.

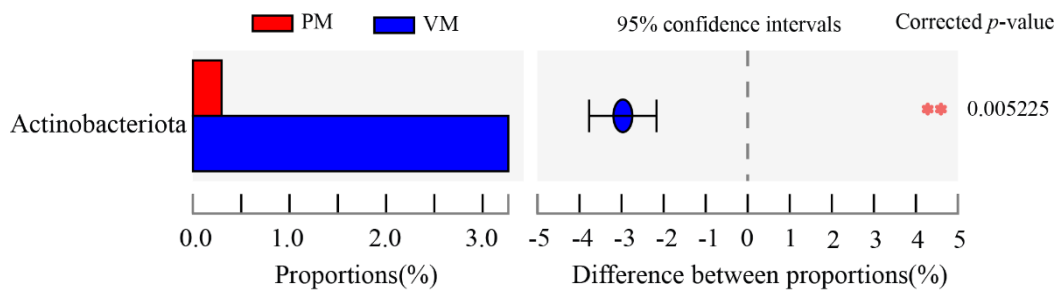

**Supplementary Figure 3.** Comparison of the bacterial phylum in the intestinal mucosae between the control and vaccinated groups. PM: intestinal mucosae in the control group; VM: intestinal mucosae in the vaccinated group. The significance of Welch t-test: \*\*  $p < 0.01$ .

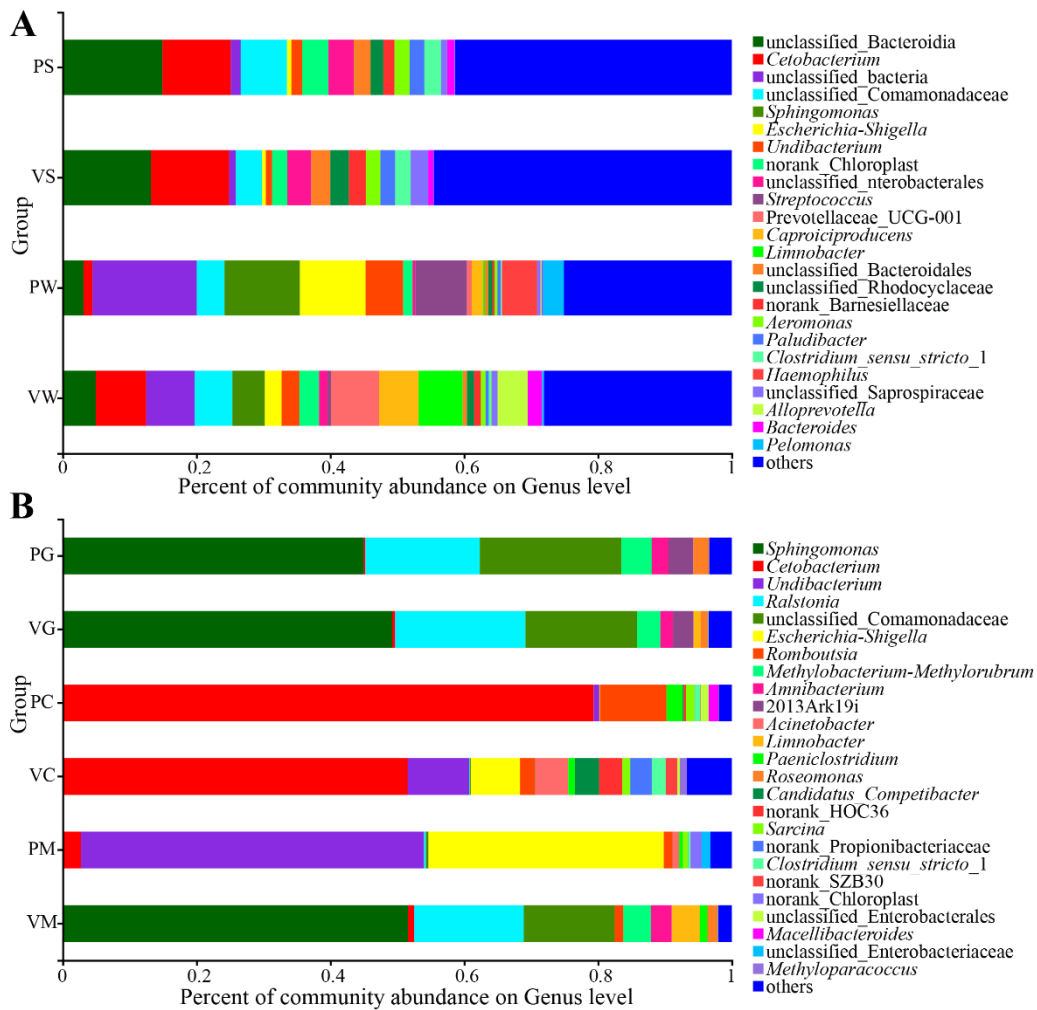

**Supplementary Figure 4.** Distribution of the bacterial communities in all samples at the genus level:

**(A)** Bacterial genera in the stomach content and mucosa samples; **(B)** Bacterial genera in the gill and intestinal samples. PS1-PS4: stomach contents in the control group; VS1-VS4: stomach contents in the vaccinated group; PW1-PW4: stomach mucosae in the control group; VW1-VW4: stomach mucosae in the vaccinated group; PG1-PG4: gill mucosae in the control group; VG1-VG4: gill mucosae in the vaccinated group; PC1-PC4: intestinal contents in the control group; VC1-VC4: intestinal contents in the vaccinated group; PM1-PM4: intestinal mucosae in the control group; VM1-VM4: intestinal mucosae in the vaccinated group.

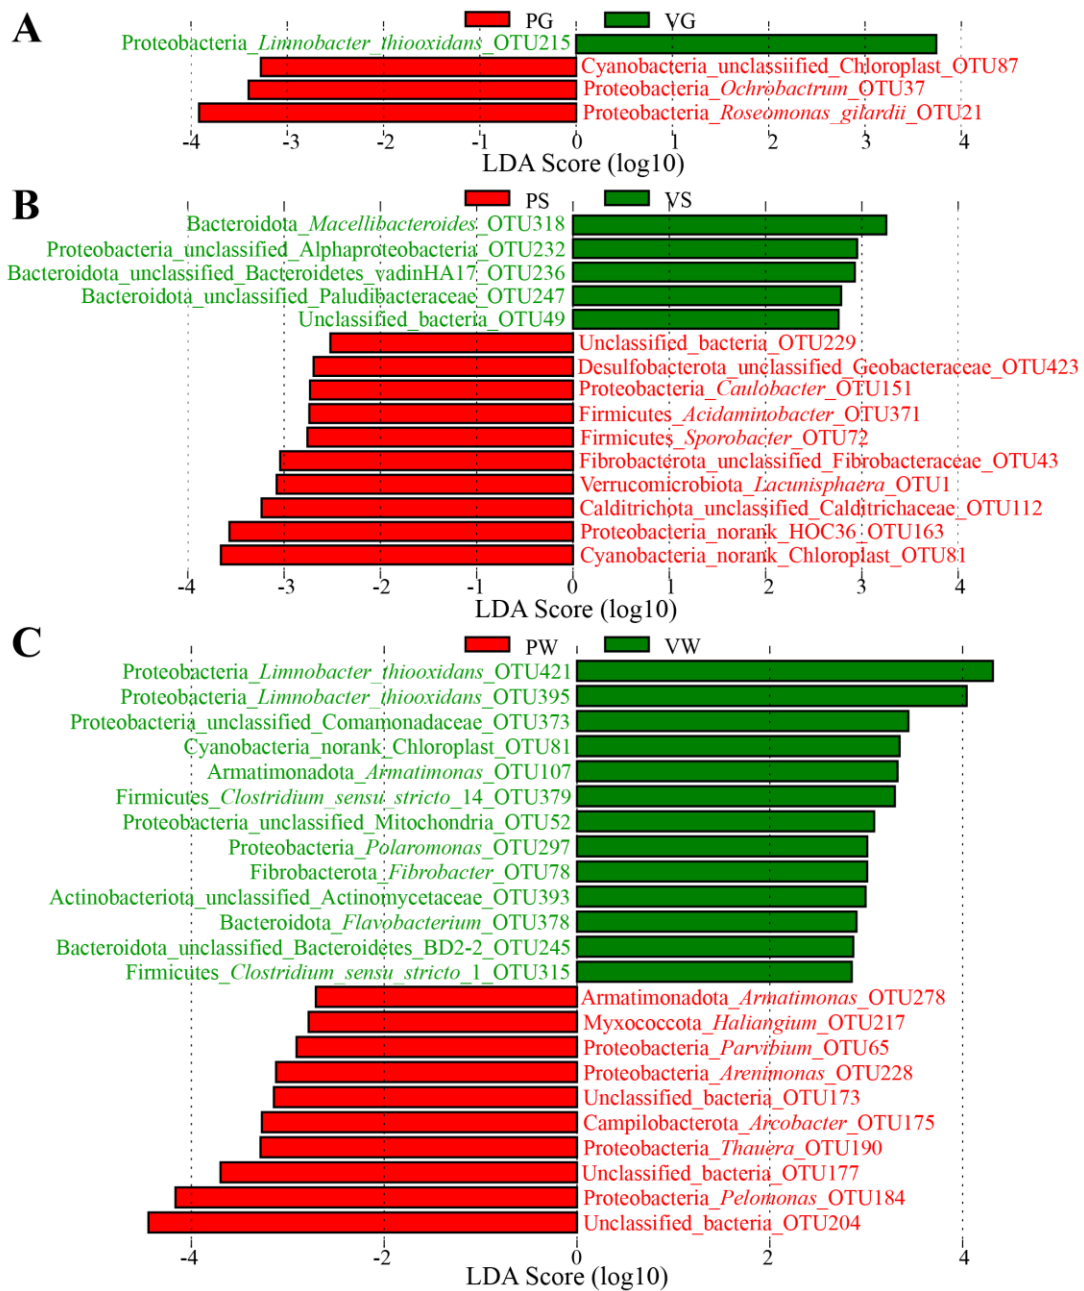

**Supplementary Figure 5.** Comparison of the bacterial communities in the gill and stomach samples at the OTU level by LEfSe: **(A)** Comparison of the bacterial communities in the gill mucosae between the control and vaccinated groups; **(B)** Comparison of the bacterial communities in the stomach contents between the control and vaccinated groups; **(C)** Comparison of the bacterial communities in the stomach mucosae between the control and vaccinated groups. The highlighted taxa are enriched in the group that

corresponds to each color; LDA scores can be interpreted as the degree of difference in the relative abundance of OTUs; PG: gill mucosae in the control group, VG: gill mucosae in the vaccinated group, PS: stomach contents in the control group, VS: stomach contents in the vaccinated group, PW: stomach mucosae in the control group, VW: stomach mucosae in the vaccinated group.



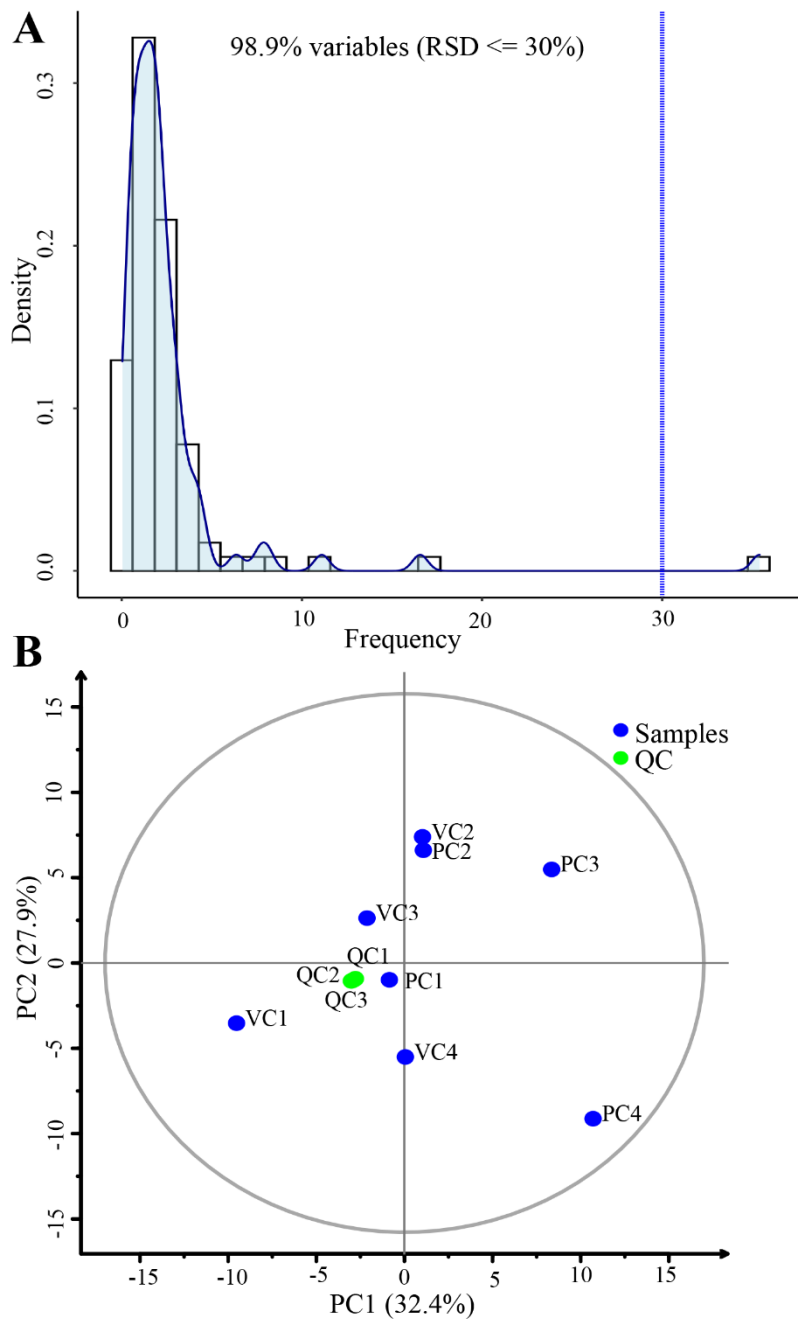

**Supplementary Figure 6.** Metabolome data processing results: **(A)** Result of quality assurance; **(B)** Result of quality control (QC). The relative standard deviation (RSD) of the QC characteristic peak, that is, the coefficient of variation should not exceed 30%.

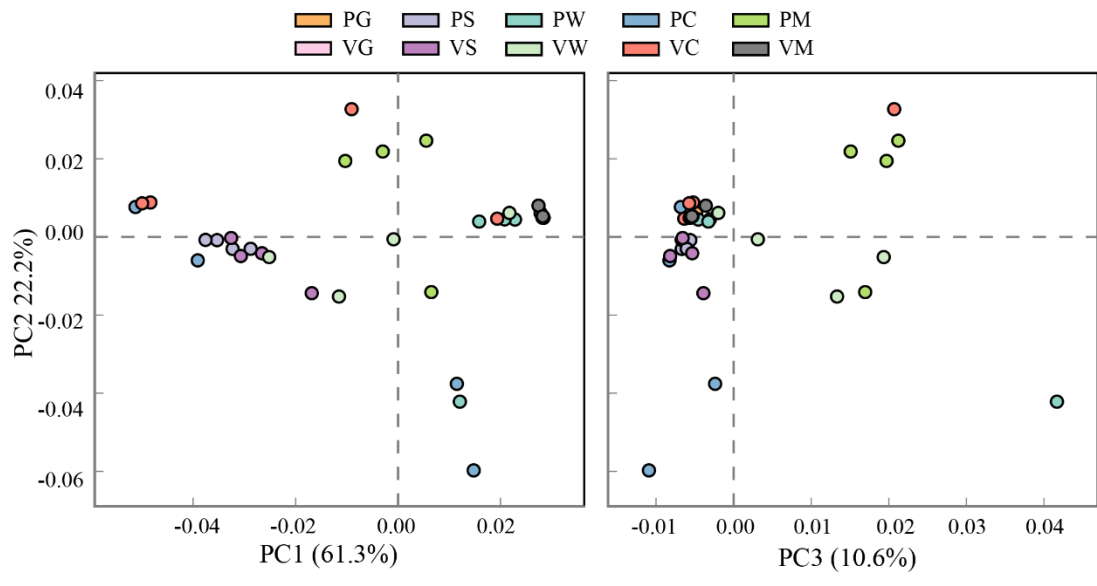

**Supplementary Figure 7.** Principal component analysis (PCA) based on the Bray-Curtis distance visualizing the integral structure dissimilarities of microbial function.
